# Supplementary material
Source: ML conference proceedings conference paper supplement (https://proceedings.mlr.press/v119/zhang20b.html)
Supplement: Supplementary file [file zhang20b-supp.pdf]

## A. Appendix

### A.1. Semantics of specifications

We define the semantics of a specification  $S = \{(T_1, \delta_1), \dots, (T_n, \delta_n)\}$  (such that  $T_i = (\varphi_i, f_i)$ ) as follows. Given a string  $\mathbf{x} = x_1 \dots x_m$ , a string  $\mathbf{y}$  is in the perturbations space  $S(\mathbf{x})$  if:

1. there exists matches  $\langle (l_1, r_1), j_1 \rangle \dots \langle (l_k, r_k), j_k \rangle$  (we assume that matches are sorted in ascending order of  $l_i$ ) such that for every  $i \leq k$  we have that  $(l_i, r_i)$  is a valid match of  $\varphi_{j_i}$  in  $\mathbf{x}$ ;
2. the matches are not overlapping: for every two distinct  $i_1$  and  $i_2$ ,  $r_{i_1} < l_{i_2}$  or  $r_{i_2} < l_{i_1}$ ;
3. the matches respect the  $\delta$  constraints: for every  $j' \leq n$ ,  $|\{(l_i, r_i), j_i\} \mid j_i = j'\}| \leq \delta_{j'}$ .
4. the string  $\mathbf{y}$  is the result of applying an appropriate transformation to each match: if for every  $i \leq k$  we have  $s_i \in f_{j_i}(x_{l_i} \dots x_{r_i})$ , then

$$\mathbf{y} = x_1 \dots x_{l_1-1} \mathbf{s}_1 x_{r_1+1} \dots x_{l_k-1} \mathbf{s}_k x_{r_k+1} \dots x_m.$$

### A.2. Proof of Theorem 1

We give the following definition of a convex set:

**Definition 1. Convex set:** A set  $\mathcal{C}$  is **convex** if, for all  $x$  and  $y$  in  $\mathcal{C}$ , the line segment connecting  $x$  and  $y$  is included in  $\mathcal{C}$ .

*Proof.* We first state and prove the following lemma.

**Lemma 2.** Given a set of points  $\{p_0, p_1, \dots, p_t\}$  and a convex set  $\mathcal{C}$  such that  $\{p_0, p_1, \dots, p_t\} \subseteq \mathcal{C}$ . These points define a set of vectors  $\overrightarrow{p_0 p_1}, \overrightarrow{p_0 p_2}, \dots, \overrightarrow{p_0 p_t}$ . If a vector  $\overrightarrow{p_0 p}$  can be represented as a sum weighed by  $\alpha_i$ :

$$\overrightarrow{p_0 p} = \sum_{i=1}^t \alpha_i \cdot \overrightarrow{p_0 p_i}, \quad (4)$$

where  $\alpha_i$  respect to constraints:

$$\sum_{i=1}^t \alpha_i \leq 1 \wedge \forall 1 \leq i \leq t. \alpha_i \geq 0, \quad (5)$$

then the point  $p$  is also in the convex set  $\mathcal{C}$ .

*Proof.* We prove this lemma by induction on  $t$ ,

- Base case:  $t = 1$ , if  $\overrightarrow{p_0 p} = \alpha_1 \cdot \overrightarrow{p_0 p_1}$  and  $0 \leq \alpha_1 \leq 1$ , then  $p$  is on the segment  $p_0 p_1$ . By the definition of the convex set (Definition 1), the segment  $p_0 p_1$  is inside the convex, which implies  $p$  is inside the convex:  $p \in p_0 p_1 \subseteq \mathcal{C}$ .

- Inductive step: Suppose the lemma holds for  $t = r$ . If a vector  $\overrightarrow{p_0 p}$  can be represented as a sum weighed by  $\alpha_i$ :

$$\overrightarrow{p_0 p} = \sum_{i=1}^{r+1} \alpha_i \cdot \overrightarrow{p_0 p_i} \quad (6)$$

where  $\alpha_i$  respect to constraints:

$$\sum_{i=1}^{r+1} \alpha_i \leq 1, \quad (7)$$

$$\forall 1 \leq i \leq r+1. \alpha_i \geq 0. \quad (8)$$

We divide the sum in Eq 6 into two parts:

$$\overrightarrow{p_0 p} = \sum_{i=1}^{r+1} \alpha_i \cdot \overrightarrow{p_0 p_i} \quad (9)$$

$$= \left( \sum_{i=1}^r \alpha_i \cdot \overrightarrow{p_0 p_i} \right) + \alpha_{r+1} \cdot \overrightarrow{p_0 p_{r+1}} \quad (10)$$

$$= (1 - \alpha_{r+1}) \overrightarrow{p_0 p'} + \alpha_{r+1} \cdot \overrightarrow{p_0 p_{r+1}} \quad \text{, and} \quad (11)$$

$$\overrightarrow{p_0 p'} = \sum_{i=1}^r \frac{\alpha_i}{1 - \alpha_{r+1}} \cdot \overrightarrow{p_0 p_i} \quad (12)$$

Because from Inequality 7, we know that

$$\sum_{i=1}^r \alpha_i \leq 1 - \alpha_{r+1},$$

which is equivalent to

$$\sum_{i=1}^r \frac{\alpha_i}{1 - \alpha_{r+1}} \leq 1.$$

This inequality enables the inductive hypothesis, and we know point  $p'$  is in the convex set  $\mathcal{C}$ . From Eq 11, we know that the point  $p$  is on the segment of  $p' p_{r+1}$ , since both two points  $p'$  and  $p_{r+1}$  are in the convex set  $\mathcal{C}$ , then the point  $p$  is also inside the convex set  $\mathcal{C}$ . □

To prove Theorem 1, we need to show that every perturbed sample  $\mathbf{y} \in S(\mathbf{x})$  lies inside the convex hull of  $\text{abstract}(S, \mathbf{x})$ .

**We first describe the perturbed sample  $\mathbf{y}$ .** The perturbed sample  $\mathbf{y}$  as a string is defined in the semantics of specification  $S$  (see the Appendix A.1). In the rest of this proof, we use a function  $E : \Sigma^m \mapsto \mathbb{R}^{m \times d}$  mapping from a string with length  $m$  to a point in  $m \times d$ -dimensional space, e.g.,  $E(\mathbf{y})$  represents the point of the perturbed sample  $\mathbf{y}$  in the

embedding space. We use  $\mathbf{x}_{\langle(l,r),j,s\rangle}$  to represent the string perturbed by a transformation  $T_j = (\varphi_j, f_j)$  such that  $(l, r)$  is a valid match of  $\varphi_j$  and  $\mathbf{s} \in f_j(x_l, \dots, x_r)$ . Then

$$\mathbf{x}_{\langle(l,r),j,s\rangle} = x_1 \dots x_{l-1} \mathbf{s} x_{r+1} \dots x_m.$$

We further define  $\Delta_{\langle(l,r),j,s\rangle}$  as the vector  $E(\mathbf{x}_{\langle(l,r),j,s\rangle}) - E(\mathbf{x}) = \overrightarrow{E(\mathbf{x})E(\mathbf{x}_{\langle(l,r),j,s\rangle})}$ :

$$\Delta_{\langle(l,r),j,s\rangle} = \underbrace{(0, \dots, 0)}_{(l-1) \times d}, E(\mathbf{s}) - E(x_l \dots x_r), \underbrace{(0, \dots, 0)}_{(m-r) \times d}.$$

A perturbed sample  $\mathbf{y}$  defined by matches  $\langle(l_1, r_1), j_1\rangle \dots \langle(l_k, r_k), j_k\rangle$  and for every  $i \leq k$  we have  $\mathbf{s}_i \in f_{j_i}(x_{l_i} \dots x_{r_i})$ , then

$$\mathbf{y} = x_1 \dots x_{l_1-1} \mathbf{s}_1 x_{r_1+1} \dots x_{l_k-1} \mathbf{s}_k x_{r_k+1} \dots x_m.$$

The matches respect the  $\delta$  constraints: for every  $j' \leq n$ ,  $|\{\langle(l_i, r_i), j_i, \mathbf{s}_i\rangle \mid j_i = j'\}| \leq \delta_{j'}$ . Thus, the size of the matches  $k$  also respect the  $\delta$  constraints:

$$k = \sum_{j'=1}^n |\{\langle(l_i, r_i), j_i, \mathbf{s}_i\rangle \mid j_i = j'\}| \leq \sum_{j'=1}^n \delta_{j'}. \quad (13)$$

In the embedding space,

$$\overrightarrow{E(\mathbf{x})E(\mathbf{y})} = \underbrace{(0, \dots, 0)}_{(l_1-1) \times d}, E(\mathbf{s}_1) - E(x_{l_1} \dots x_{r_1}), \\ 0, \dots, 0, E(\mathbf{s}_k) - E(x_{l_k} \dots x_{r_k}), \underbrace{(0, \dots, 0)}_{(m-r_k) \times d}.$$

Thus, we can represent  $\overrightarrow{E(\mathbf{x})E(\mathbf{y})}$  using  $\Delta_{\langle(l,r),j,s\rangle}$ :

$$\overrightarrow{E(\mathbf{x})E(\mathbf{y})} = \sum_{i=1}^k \Delta_{\langle(l_i, r_i), j_i, \mathbf{s}_i\rangle}. \quad (14)$$

**We then describe the convex hull of  $\mathit{abstract}(S, \mathbf{x})$ .** The convex hull of  $\mathit{abstract}(S, \mathbf{x})$  is constructed by a set of points  $E(\mathbf{x})$  and  $E(\mathbf{v}_{\langle(l,r),i,s\rangle})$ , where points  $E(\mathbf{v}_{\langle(l,r),i,s\rangle})$  are computed by:

$$E(\mathbf{v}_{\langle(l,r),j,s\rangle}) \triangleq E(\mathbf{x}) + \left( \sum_{i=1}^n \delta_i \right) (E(\mathbf{x}_{\langle(l,r),j,s\rangle}) - E(\mathbf{x})).$$

Alternatively, using the definition of  $\Delta_{\langle(l,r),j,s\rangle}$ , we get

$$\overrightarrow{E(\mathbf{x})E(\mathbf{v}_{\langle(l,r),j,s\rangle})} = \left( \sum_{i=1}^n \delta_i \right) \Delta_{\langle(l,r),j,s\rangle}. \quad (15)$$

**We then prove the Theorem 1.** To prove  $E(\mathbf{y})$  lies in the convex hull of  $\mathit{abstract}(S, \mathbf{x})$ , we need to apply Lemma 2.

Notice that a convex hull by definition is also a convex set. Because from Eq 14, we have

$$\overrightarrow{E(\mathbf{x})E(\mathbf{y})} = \sum_{i=1}^k \Delta_{\langle(l_i, r_i), j_i, \mathbf{s}_i\rangle} \\ = \frac{1}{\sum_{i=1}^n \delta_i} \sum_{i=1}^k \left( \sum_{i'=1}^n \delta_{i'} \right) \Delta_{\langle(l_i, r_i), j_i, \mathbf{s}_i\rangle}.$$

We can use Eq 15 into the above equation, and have

$$= \frac{1}{\sum_{i=1}^n \delta_i} \sum_{i=1}^k \overrightarrow{E(\mathbf{x})E(\mathbf{v}_{\langle(l_i, r_i), j_i, \mathbf{s}_i\rangle})} \\ = \sum_{i=1}^k \left( \frac{1}{\sum_{i=1}^n \delta_i} \right) \cdot \overrightarrow{E(\mathbf{x})E(\mathbf{v}_{\langle(l_i, r_i), j_i, \mathbf{s}_i\rangle})}.$$

To apply Lemma 2, we set

$$\alpha_i = \frac{1}{\sum_{j=1}^n \delta_j}.$$

Using Inequality 13 on

$$\alpha_i = \frac{1}{\sum_{j=1}^n \delta_j} \geq 0, \quad (16)$$

we get

$$\sum_{i=1}^k \alpha_i = \sum_{i=1}^k \frac{1}{\sum_{j=1}^n \delta_j} = \frac{k}{\sum_{j=1}^n \delta_j} \leq 1. \quad (17)$$

The constraints in Inequality 16 and Inequality 17 enable Lemma 2, and by applying Lemma 2, we know that point  $E(\mathbf{y})$  is inside the convex hull of  $\mathit{abstract}(S, \mathbf{x})$ .  $\square$

### A.3. Details of Experiment Setup

For AG dataset, we trained a smaller character-level model than the one used in Huang et al. (2019). We followed the setup of the previous work: use lower-case letters only and truncate the inputs to have at most 300 characters. The model consists of an embedding layer of dimension 64, a 1-D convolution layer with 64 kernels of size 10, a ReLU layer, a 1-D average pooling layer of size 10, and two fully-connected layers with ReLUs of size 64, and a linear layer. We randomly initialized the character embedding and updated it during training.

For SST2 dataset, we trained the same word-level model as the one used in Huang et al. (2019). The model consists of an embedding layer of dimension 300, a 1-D convolution layer with 100 kernels of size 5, a ReLU layer, a 1-D average pooling layer of size 5, and a linear layer. We used the pre-trained Glove embedding (Pennington et al., 2014) with dimension 300 and fixed it during training.

For SST2 dataset, we trained the same character-level model as the one used in [Huang et al. \(2019\)](#). The model consists of an embedding layer of dimension 150, a 1-D convolution layer with 100 kernels of size 5, a ReLU layer, a 1-D average pooling layer of size 5, and a linear layer. We randomly initialized the character embedding and updated it during training.

For all models, we used Adam ([Kingma & Ba, 2015](#)) with a learning rate of 0.001 for optimization and applied early stopping policy with patience 5.

### A.3.1. PERTURBATIONS

We provide the details of the string transformations we used:

- $T_{SubAdj}, T_{InsAdj}$ : We allow each character substituting to one of its adjacent characters on the QWERTY keyboard.
- $T_{DelStop}$ : We choose  $\{and, the, a, to, of\}$  as our stop words set.
- $T_{SubSyn}$ : We use the synonyms provided by PPDB ([Pavlick et al., 2015](#)). We allow each word substituting to its closest synonym when their part-of-speech tags are also matched.

### A.3.2. BASELINE

**Random augmentation** performs adversarial training using a weak adversary that simply picks a random perturbed sample from the perturbation space. For a specification  $S = \{(T_1, \delta_1), \dots, (T_n, \delta_n)\}$ , we produce  $\mathbf{z}$  by uniformly sampling one string  $\mathbf{z}_1$  from a string transformation  $(T_1, \delta_1)$  and passing it to the next transformation  $(T_2, \delta_2)$ , where we then sample a new string  $\mathbf{z}_2$ , and so on until we have exhausted all transformations. The objective function is the following:

$$\operatorname{argmin}_{\theta} \mathbb{E}_{(\mathbf{x}, y) \sim \mathcal{D}} (\mathcal{L}(x, y, \theta) + \max_{\mathbf{z} \in R(\mathbf{x})} \mathcal{L}(\mathbf{z}, y, \theta)) \quad (18)$$

**HotFlip augmentation** performs adversarial training using the HotFlip ([Ebrahimi et al., 2018](#)) attack to find  $\mathbf{z}$  and solve the inner maximization problem. The objective function is the same as Eq 18.

**A3T** adopts a curriculum-based training method ([Huang et al., 2019](#); [Gowal et al., 2019](#)) that uses a hyperparameter  $\lambda$  to weigh between normal loss and maximization objective in Eq. (2). We linearly increase the hyperparameter  $\lambda$  during training.

$$\operatorname{argmin}_{\theta} \mathbb{E}_{(\mathbf{x}, y) \sim \mathcal{D}} ((1 - \lambda)\mathcal{L}(x, y, \theta) + \lambda \max_{\mathbf{z} \in \text{augment}_k(S_{abs}, \mathbf{x})} \mathcal{L}(\text{abstract}(S_{abs}\mathbf{z}), y, \theta)).$$

Also, we set  $k$  in  $\text{augment}_k$  to 2, which means we select 2 perturbed samples to abstract.

### A.3.3. EVALUATION RESULTS

**RQ2: Effects of size of the perturbation space** In Figure 4, we fix the word-level model A3T (search) trained on  $\{(T_{Dup}, 2), (T_{SubSyn}, 2)\}$ . Then, we test this model’s exhaustive accuracy on  $\{(T_{Dup}, \delta_1), (T_{SubSyn}, 2)\}$  (Figure 4(a)) and  $\{(T_{Dup}, 2), (T_{SubSyn}, \delta_2)\}$  (Figure 4(b)), where we vary the parameters  $\delta_1$  and  $\delta_2$  between 1 and 4, increasing the size of the perturbation space. The exhaustive accuracy of A3T(HotFlip) and A3T(search) decreases by 17.4% and 11.4%, respectively, when increasing  $\delta_1$  from 1 to 4, and decreases by 2.3% and 1.9%, respectively, when increasing  $\delta_2$  from 1 to 4. All other techniques result in larger decreases in exhaustive accuracy ( $\geq 17.5\%$  in  $\{(T_{Dup}, \delta_1), (T_{SubSyn}, 2)\}$  and  $\geq 3.1\%$  in  $\{(T_{Dup}, 2), (T_{SubSyn}, \delta_2)\}$ ).

In Figure 5, we fix the word-level model A3T (search) trained on  $\{(T_{DelStop}, 2), (T_{Dup}, 2), (T_{SubSyn}, 2)\}$ . Then, we test this model’s exhaustive accuracy on  $\{(T_{DelStop}, \delta_1), (T_{Dup}, 2), (T_{SubSyn}, 2)\}$  (Figure 5(a)),  $\{(T_{DelStop}, 2), (T_{Dup}, \delta_2), (T_{SubSyn}, 2)\}$  (Figure 5(b)), and  $\{(T_{DelStop}, 2), (T_{Dup}, 2), (T_{SubSyn}, \delta_3)\}$  (Figure 5(c)), where we vary the parameters  $\delta_1, \delta_2$  and  $\delta_3$  between 1 and 3, increasing the size of the perturbation space. The exhaustive accuracy of A3T(HotFlip) and A3T(search) decreases by 1.1% and 0.9%, respectively, when increasing  $\delta_1$  from 1 to 3, decreases by 12.9% and 6.9%, respectively, when increasing  $\delta_2$  from 1 to 3, and decreases by 1.4% and 0.9%, respectively, when increasing  $\delta_3$  from 1 to 3. All other techniques result in larger decreases in exhaustive accuracy ( $\geq 2.2\%$  in  $\{(T_{DelStop}, \delta_1), (T_{Dup}, 2), (T_{SubSyn}, 2)\}$ ,  $\geq 13.0\%$  in  $\{(T_{DelStop}, 2), (T_{Dup}, \delta_2), (T_{SubSyn}, 2)\}$ , and  $\geq 2.8\%$  in  $\{(T_{DelStop}, 2), (T_{Dup}, 2), (T_{SubSyn}, \delta_3)\}$ ).

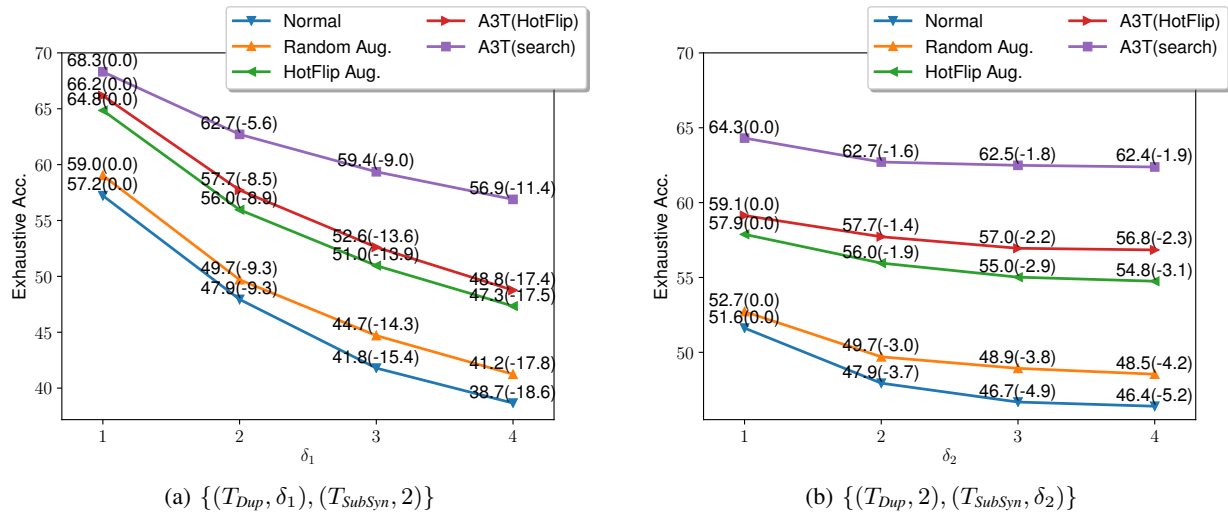

Figure 4. The exhaustive accuracy of  $\{(T_{Dup}, \delta_1), (T_{SubSyn}, \delta_2)\}$ , varying the parameters  $\delta_1$  (left) and  $\delta_2$  (right) between 1 and 4.

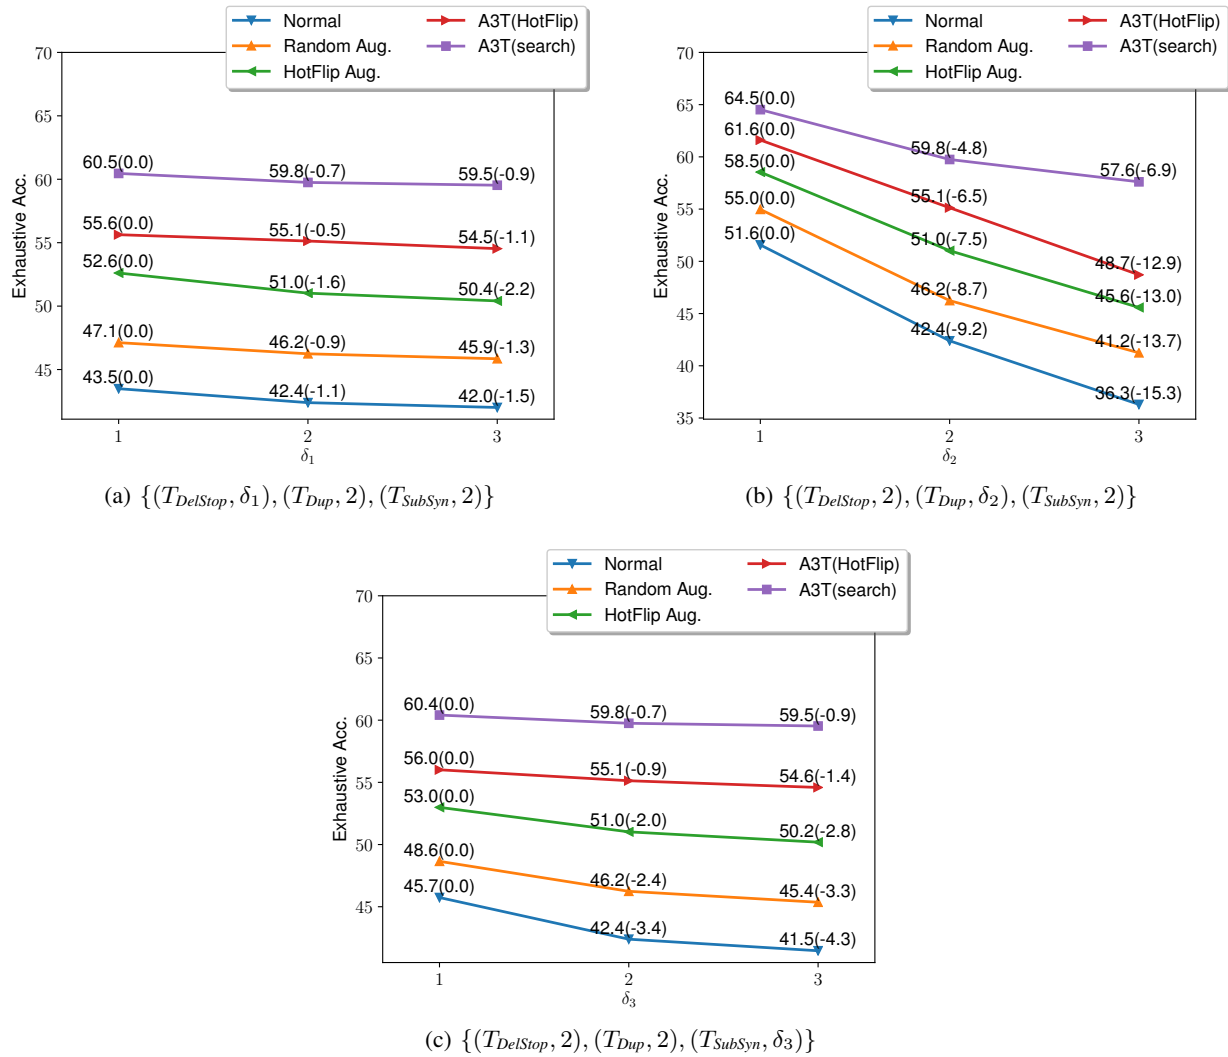

Figure 5. The exhaustive accuracy of  $\{(T_{DelStop}, \delta_1), (T_{Dup}, \delta_2), (T_{SubSyn}, \delta_3)\}$ , varying the parameters  $\delta_1$  (left),  $\delta_2$  (middle), and  $\delta_3$  (right) between 1 and 3.
